# Supplementary material
Source: PubMed Central journal article supplement (PMC5958454)
Supplement: 24620_Appendix.pdf [file 24620_Appendix.pdf]

**Appendix Table A1.** Study Characteristics as well as Incidence, Severity, and Location of Injuries for Included Studies

| Study                                    | Study Design                        | Sample Size, N | Level of Play                       | Age Category, y, Mean ± SD | Injury Incidence (Matches vs Training), Injuries/1000 Player-Hours (95% CI) | Mean Injury Severity (Matches vs Training), Days of Time-Loss (95% CI) | Main Anatomical Locations of Match-Related Injury (Descending Order)     | Main Anatomical Locations of Training-Related Injury (Descending Order)             |
|------------------------------------------|-------------------------------------|----------------|-------------------------------------|----------------------------|-----------------------------------------------------------------------------|------------------------------------------------------------------------|--------------------------------------------------------------------------|-------------------------------------------------------------------------------------|
| Fuller et al. (2008) <sup>[11]</sup>     | Prospective whole population survey | 626            | Men's international (2007 RWC)      | Adult<br>27.6 ± 3.5        | Match: 83.9 (71.9 to 97.9)<br>Training: 3.5 (2.7 to 4.5)                    | Match: 14.7 (11.7 to 17.7)<br>Training: 17.8 (21.1 to 23.5)            | Knee, followed by equal amounts of posterior thigh & shoulder            | Knee, posterior thigh, followed by equal amounts of ankle and lower leg/Achilles    |
| Fuller et al. (2013) <sup>[14]</sup>     | Prospective whole population survey | 615            | Men's international (2011 RWC)      | Adult<br>27.4 ± 3.6        | Match: 89.1 (76.7 to 103.5)<br>Training: 2.2 (1.6 to 3.1)                   | Match: 23.6 (16.9 to 30.4)<br>Training: 26.9 (10.2 to 43.5)            | Head/face, shoulder/clavicle, posterior thigh                            | Posterior thigh & lower leg/Achilles followed by lower back                         |
| Fuller et al. (2016) <sup>[15]</sup>     | Prospective whole population survey | 639            | Men's international (2015 RWC)      | Adult<br>27.4 ± 3.8        | Match: 90.1 (77.6 to 104.6)<br>Training: 1.0 (0.7 to 1.6)                   | Match: 29.8 (22.4 to 37.2)<br>Training: 14.4 (7.0 to 21.8)             | Head/face, knee, posterior thigh                                         | Not reported due to relatively low numbers                                          |
| Schick et al. (2008) <sup>[25]</sup>     | Prospective cohort study            | 339            | Women's international (2006 RWC)    | Adult<br>28 ± 4.7          | Match: 37.5 (CI not reported)<br>Training: 3.0 (CI not reported)            | Not reported                                                           | Equal amounts of neck/cervical spine & knee injury followed by head/face | Not reported                                                                        |
| Taylor et al. (2011) <sup>[29]</sup>     | Prospective cohort study            | 285            | Women's international (2010 RWC)    | Adult<br>27.2 ± 4.4        | Match: 35.5 (25.9 to 48.6)<br>Training: Not reported                        | Match: 55 (24.1 to 85.9)<br>Training: Not reported                     | Knee, head/face, ankle                                                   | Not reported                                                                        |
| Moore et al. (2015) <sup>[18]</sup>      | Descriptive epidemiological study   | 78             | Men's international                 | Adult unspecified          | Match: 180.0 (152.9 to 211.9)<br>Training: 4.7 (3.5 to 6.4)                 | Match: 18 (CI not reported)<br>Training: 19 (CI not reported)          | Shoulder/clavicle, head and neck, thigh                                  | Not reported                                                                        |
| Fuller et al. (2009) <sup>[13]</sup>     | Prospective cohort study            | 441            | Men's professional - Premier League | Adult<br>24.7 ± 3.2        | Match: 96.3 (86.9 to 106.7)<br>Training: Not reported                       | Match: 13.4 (CI not reported)<br>Training: Not reported                | Lower limb, head/neck, trunk                                             | Not reported                                                                        |
|                                          |                                     | 372            | - Vodacom Cup                       | 23.8 ± 2.9                 | Match: 71.2 (60.0 to 84.5)<br>Training: Not reported                        | Match: 1.2 (CI not reported)<br>Training: Not reported                 | Lower limb, upper limb, head/neck                                        |                                                                                     |
| Whitehouse et al. (2016) <sup>[35]</sup> | Prospective epidemiological study   | 180            | Men's professional - Premier League | Adult<br>24.8 ± 3.15       | Match: 66.07 (53.78 to 78.36)<br>Training: 2.33 (1.69 to 2.98)              | Match: 39.8 (35.87 to 43.83)<br>Training: 32.22 (26.36 to 38.26)       | Head/neck, knee, shoulder/clavicle                                       | Thigh, knee, & ankle                                                                |
| Schwellnus et al. (2014) <sup>[27]</sup> | Prospective cohort study            | 152            | Men's professional - Premier League | Adult<br>25 ± 3.4          | Match: 83.3 (69.4 to 99.2)<br>Training: 2.1 (1.5 to 3.0)                    | Not reported                                                           | Shoulder/clavicle, knee, head/face                                       | Thigh most frequent (otherwise numbers too low for meaningful subcategory analysis) |

|                               |                                          |                          |                                                                                |                                                                              |                                                                                                                                                                                                                                                                                          |                                                                                                                                                                              |                                                                             |                                                            |
|-------------------------------|------------------------------------------|--------------------------|--------------------------------------------------------------------------------|------------------------------------------------------------------------------|------------------------------------------------------------------------------------------------------------------------------------------------------------------------------------------------------------------------------------------------------------------------------------------|------------------------------------------------------------------------------------------------------------------------------------------------------------------------------|-----------------------------------------------------------------------------|------------------------------------------------------------|
| Schneiders et al. (2009) [26] | Prospective epidemiological cohort study | 271                      | Men's community:<br>- Premier Club                                             | Adult<br>21.8 ± 2.8                                                          | Match: 52.0 (42.0 to 65.0)<br>Training: not reported                                                                                                                                                                                                                                     | Not reported                                                                                                                                                                 | Head/face, knee, shoulder                                                   | Not reported                                               |
| Roberts et al. (2013) [23]    | Prospective cohort study                 | Not given                | Men's community:<br>- semi-professional<br><br>- Amateur<br><br>- Recreational | Adult unspecified                                                            | Match: 21.7 (19.8 to 23.6)<br>Training: not reported<br><br>Match: 16.6 (15.2 to 17.9)<br>Training: not reported<br><br>Match: 14.2 (13.0 to 15.5)<br>Training: not reported                                                                                                             | Match: 52.5 (47.6 to 57.4)<br>Training: not reported<br><br>Match: 55.3 (51.1 to 59.6)<br>Training: not reported<br><br>Match: 50.4 (46.2 to 54.6)<br>Training: not reported | Knee, shoulder, ankle<br>– reported across all groups                       | Not reported                                               |
| Haseler et al. (2010) [16]    | Prospective cohort study                 | 210                      | Boys amateur:<br>- Junior school<br><br>- Senior school<br><br>- Pubertal      | U9-U11<br>U9-U12<br>U13-U17<br><br>U12-U17<br>U16-U17<br><br>U17             | Match: 6.0 (CI not reported)<br>Match: 11.9 (CI not reported)<br>Match: 34.2 (CI not reported)<br>Training: not reported<br><br>Match: 31.6 (CI not reported)<br>Match: 39.7 (CI not reported)<br>Training: not reported<br><br>Match: 49.26 (CI not reported)<br>Training: not reported | Not reported                                                                                                                                                                 | Head/neck, knee & shoulder (equal proportions) – reported across all groups | Not reported                                               |
| McIntosh et al. (2010) [17]   | Cluster randomized control trial         | 230<br>280<br>257<br>420 | Youth amateur (Male)                                                           | U13 (13.0 ± 0.3)<br>U15 (15.0 ± 0.4)<br>U18 (17.4 ± 0.3)<br>U20 (19.1 ± 0.9) | Match: 11.8 (8.9 to 15.5)<br>Match: 22.3 (18.3 to 27.1)<br>Match: 22.2 (19.0 to 25.8)<br>Match: 22.6 (20.2 to 25.4)<br>Training: not reported                                                                                                                                            | Not reported                                                                                                                                                                 | Not reported                                                                | Not reported                                               |
| Nicol (2011) [19]             | Prospective cohort study                 | 470                      | Boys amateur                                                                   | 11-17                                                                        | Match: 10.8 (CI not reported)<br>Training: not reported                                                                                                                                                                                                                                  | Not reported                                                                                                                                                                 | Head/face, shoulder, knee                                                   | Not reported                                               |
| Palmer Green (2013) [20, 21]  | Observational prospective cohort study   | 250<br><br>222           | Boys professional academy<br><br>Boys amateur                                  | 16-18<br><br>16-18                                                           | Match: 47.0 (39.0 to 67.0)<br>Training: 1.4 (1.0 to 1.7)<br><br>Match: 35.0 (29.0 to 41.0)<br>Training: 2.1 (1.4 to 2.9)                                                                                                                                                                 | Match: 32.0 (26.0 to 38.0)<br>Training: 17.0 (11.0 to 22.0)<br><br>Match: 30.0 (25.0 to 35.0)<br>Training: 27.0 (9.0 to 45.0)                                                | Ankle/heel, shoulder, knee<br><br>Shoulder and head                         | Ankle/heel, knee<br><br>Lumbar spine, ankle/heel, shoulder |
